# Supplementary material for: FGF-2b and h-PL Transform Duct and Non-Endocrine Human Pancreatic Cells into Endocrine Insulin Secreting Cells by Modulating Differentiating Genes
Source: MDPI journal article supplement (doi:10.3390/ijms18112234), 2017-10-25
Supplement: s1 [file s1]

**A**                    **- Glucose**

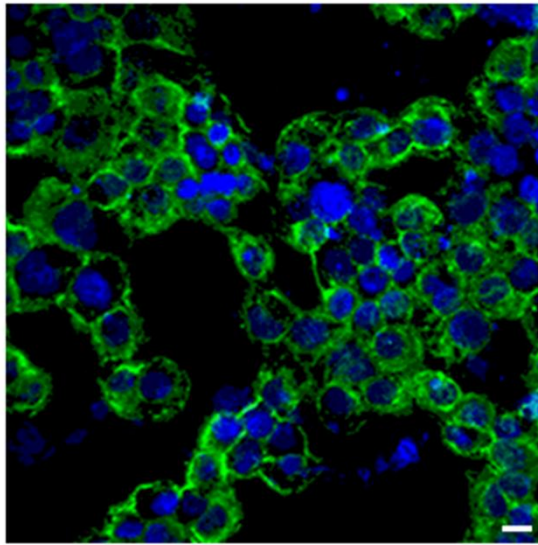

**B**                    **+ Glucose**

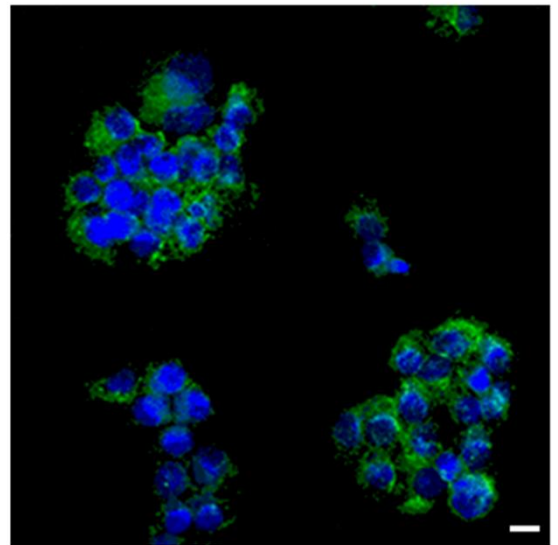

---

### **SDT/FGF2/hPL-A**

**Supplementary Figure 1.** *Confocal microscopy analysis of PDX-1 internalization.* Islet-like aggregates obtained after 96h of treatment of PANC-1 cells with FGF-2b plus hPL-A (A, B) and stimulated with glucose (20mM for 1 hours) (B), were disaggregated to form single cell suspensions. Cells were then centrifuged with a cytopsin on polyllysine-coated slides and immediately fixed by paraformaldehyde 4%. After permeabilization, cells were stained for PDX-1 (green) while nuclei were blue-stained by Hoechst (A, B). Confocal microscopy analysis showed that treatment with FGF-2b plus hPL-A induced an increase of PDX-1 staining in the nucleus, after stimulation with glucose (B) that induces PDX-1 internalization. Space bar = 20  $\mu$ m.
